# Supplementary material for: Local spring effect in titanium-based layered oxides
Source: Royal Society of Chemistry journal article supplement (doi:10.1039/d0ee02313b), 2020-01-01
Supplement: d0ee02313b1.pdf [file d0ee02313b1.pdf]

## Supplemental Information

### Local spring effect in titanium-based layered oxides

*Heng Su<sup>ab,1</sup>, Gencai Guo<sup>a,1</sup>, Yang Ren<sup>c</sup>, Xiqian Yu<sup>d</sup>, Xu Zhang<sup>a</sup>, Tianyuan Ma<sup>b</sup>, Yue Lu<sup>e</sup>,  
Zihe Zhang<sup>a</sup>, Hao Ma<sup>a</sup>, Manling Sui<sup>e</sup>, Hong Li<sup>d</sup>, Chengjun Sun<sup>c</sup>, Zonghai Chen<sup>b</sup>,  
Guiliang Xu<sup>b</sup>, Ruzhi Wang<sup>a\*</sup>, Khalil Amine<sup>bfg\*</sup> and Haijun Yu<sup>a\*</sup>*

<sup>a</sup>Faculty of Materials and Manufacturing, Key Laboratory of Advanced Functional Materials, Education Ministry of China, Beijing University of Technology, Beijing 100124, P.R. China; Email: [hj-yu@bjut.edu.cn](mailto:hj-yu@bjut.edu.cn).

<sup>b</sup>Chemical Sciences and Engineering Division, Argonne National Laboratory, Argonne, Illinois 60439, USA.

<sup>c</sup>X-ray Science Division, Argonne National Laboratory, 9700 South Cass Avenue, Argonne, IL 60439 (USA).

<sup>d</sup>Key Laboratory for Renewable Energy, Beijing Key Laboratory for New Energy Materials and Devices, National Laboratory for Condensed Matter Physics, Institute of Physics, Chinese academy of Sciences, Beijing, 100190, China.

<sup>e</sup>Institute of Solid State Microstructure and Properties, Beijing University of Technology, Pingleyuan #100, Chaoyang District, Beijing 100124, China.

<sup>f</sup>Department of Material Science and Engineering, Stanford University, Stanford, CA 94305, USA.

<sup>g</sup>Institute for Research and Medical Consultations (IRMC), Imam Abdulrahman Bin Faisal University (IAU), Dammam, 34212 Saudi Arabia.

<sup>1</sup>These authors contributed equally to this work.

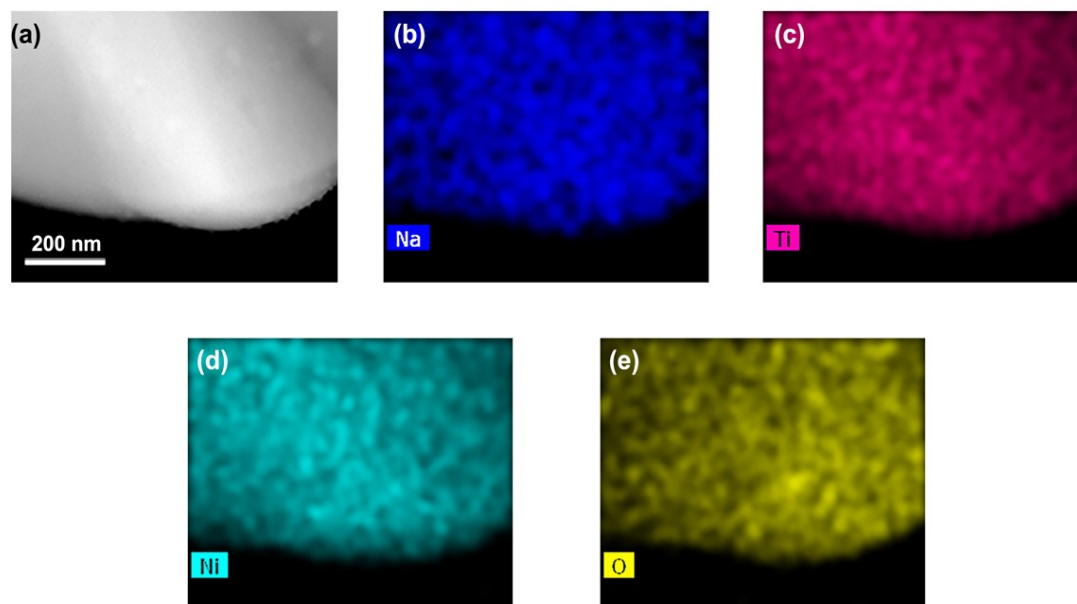

**Fig. S1.** (a) High-angle annular dark-field (HAADF) TEM image of the pristine P2-NNT. (b-e) The corresponding elemental maps including Na (b), Ti (c), Ni (d), and O (e).

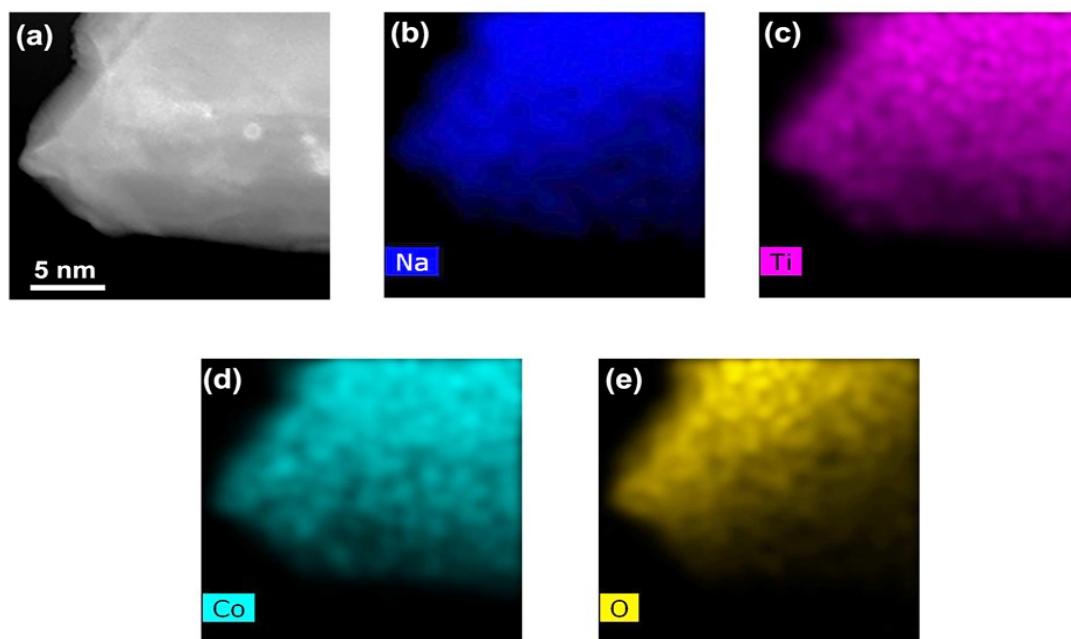

**Fig. S2.** (a) High-angle annular dark-field (HAADF) TEM image of the pristine P2-NCT. (b-e) The corresponding elemental maps including Na (b), Ti (c), Ni (d), and O (e).

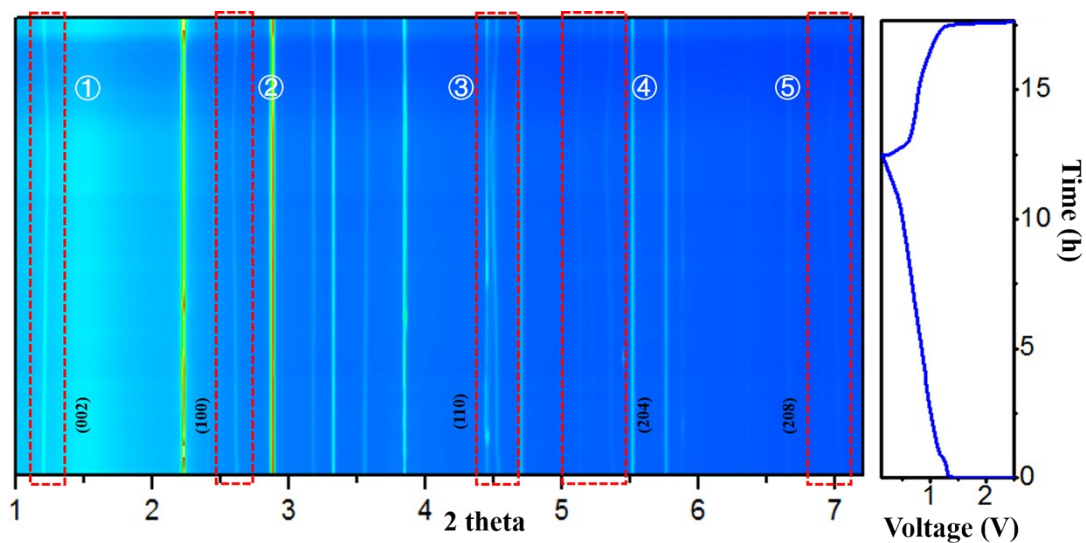

**Fig. S3.** HEXRD patterns of P2-NCT. The red rectangles labeled ①, ②, ③, ④ and ⑤ correspond to the regions of (002), (100), (110), (204), and (208) peaks, respectively. All the peaks can be indexed into a pure P2-type structure and smoothly shift without any new peak generation, indicating a solid solution mechanism. The right part of Fig. S3 shows the discharge/charge curves of P2-NCT in the first cycle at 0.1 C between 0-2.5 V.

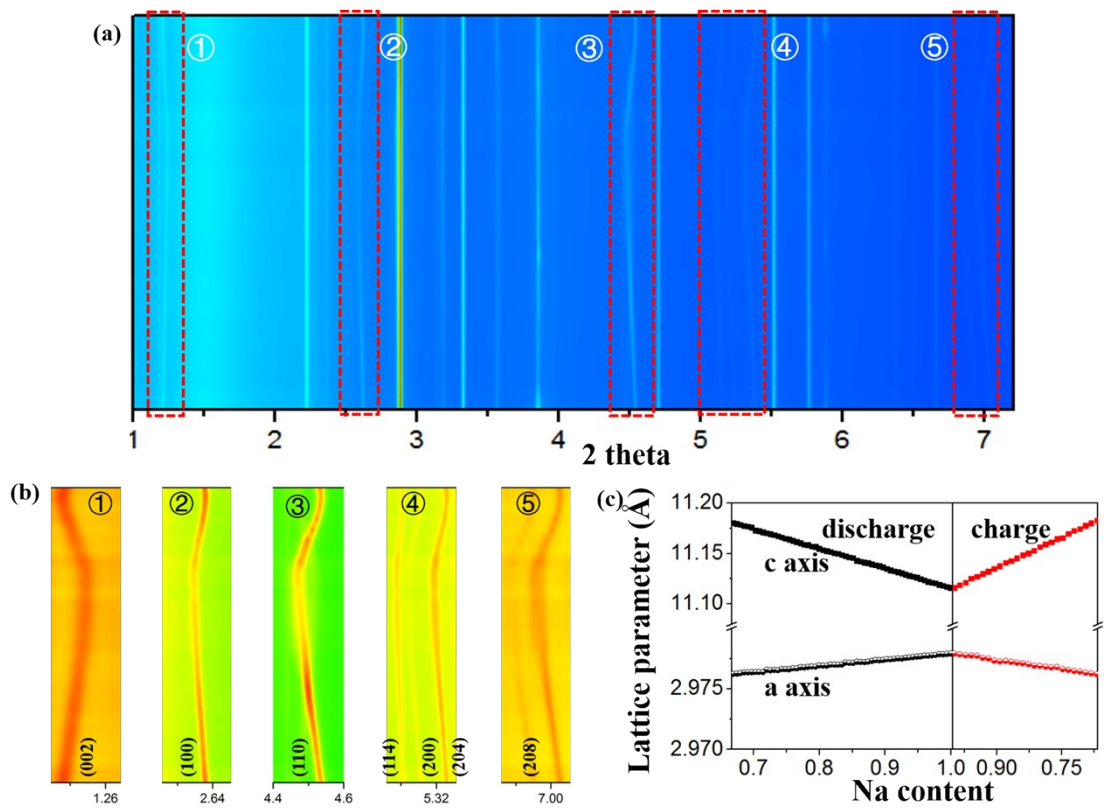

**Fig. S4.** *In-situ* HEXRD of P2-NNT in the second cycle. The red rectangles labeled ①, ②, ③, ④ and ⑤ correspond to the regions of (002), (100), (110), (204), and (208) peaks, respectively. (a) Patterns collected during the second cycle between 0.15-2.5 V at 0.1C. (b) Enlarged *In-situ* HEXRD patterns of the red dash-line rectangles in Fig. S4a. (c) The evolution of lattice parameters  $a$  and  $c$  during the charge and discharge process. All the peaks can be indexed into a pure P2-type structure and smoothly shift without any new peak generation, indicating a solid solution mechanism.

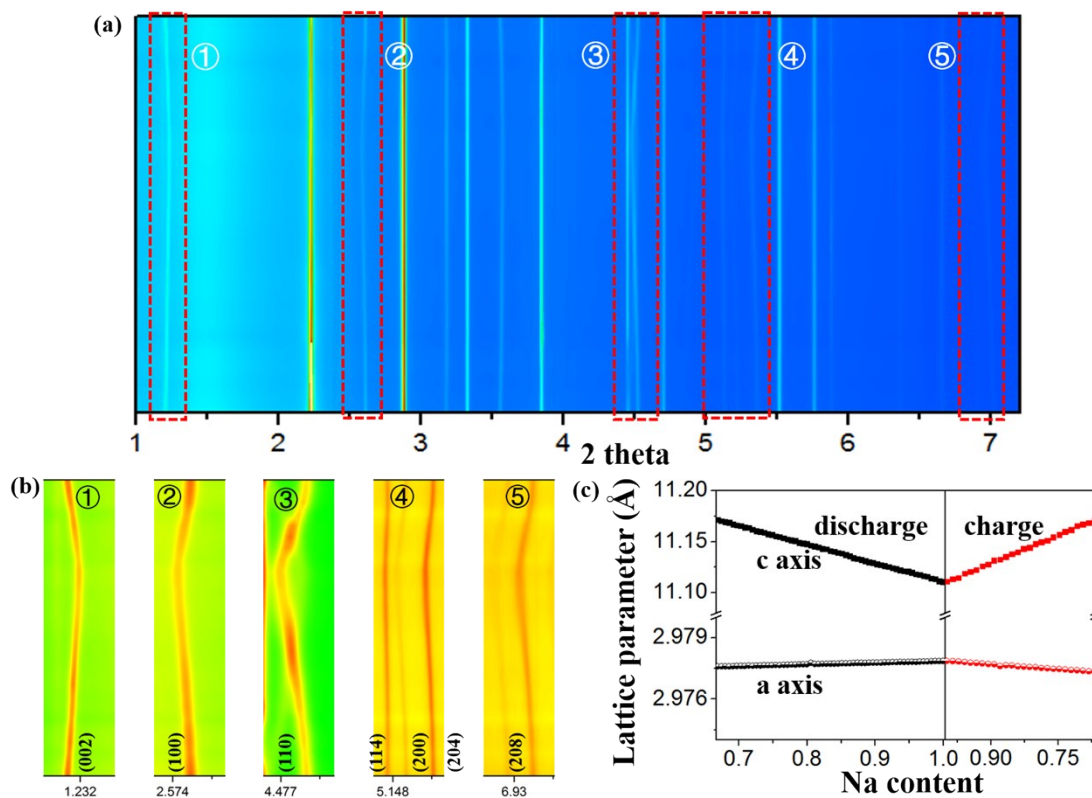

**Fig. S5.** *In-situ* HEXRD of P2-NCT in the second cycle. The red rectangles labeled ①, ②, ③, ④ and ⑤ correspond to the regions of (002), (100), (110), (204), and (208) peaks, respectively. (a) Patterns collected during the second cycle between 0.15-2.5 V at 0.1C. (b) Enlarged *In-situ* HEXRD patterns of the red dash-line rectangles in Fig. S5a. (c) The evolution of lattice parameters  $a$  and  $c$  during the charge and discharge process. All the peaks can be indexed into a pure P2-type structure and smoothly shift without any new peak generation, indicating a solid solution mechanism.

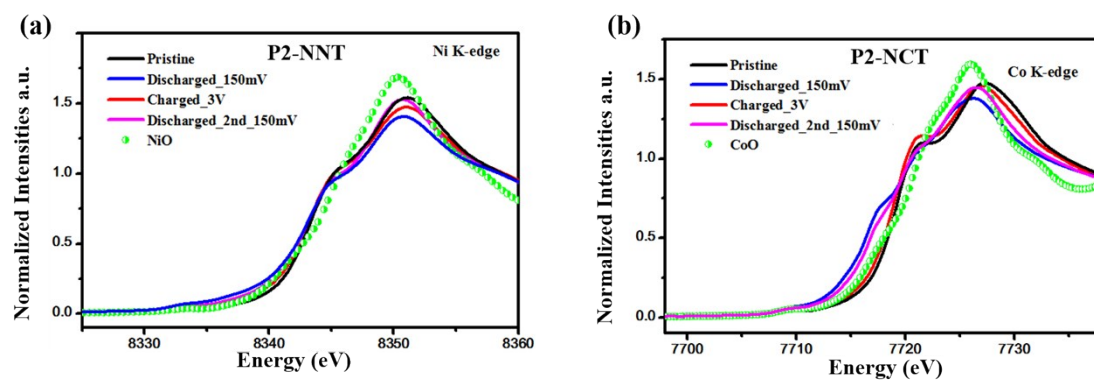

**Fig. S6.** *Ex-situ* Ni K-edge XANES spectra of P2-NNT (a) and Co K-edge XANES spectra of P2-NCT at the pristine, fully charged, and fully discharged states.

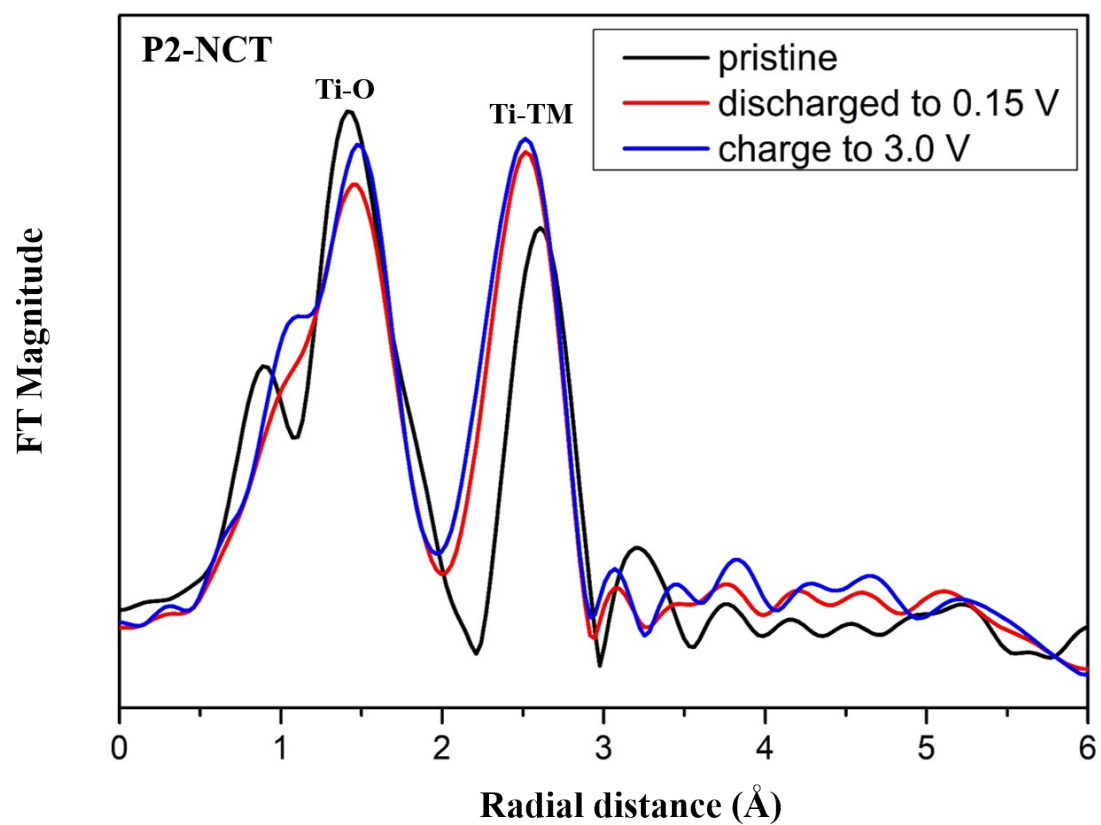

**Fig. S7.** Fourier transform data of Ti K-edge XANES spectra of the P2-NCT electrode at the pristine (black line), discharged (red line), and charged states (blue line).



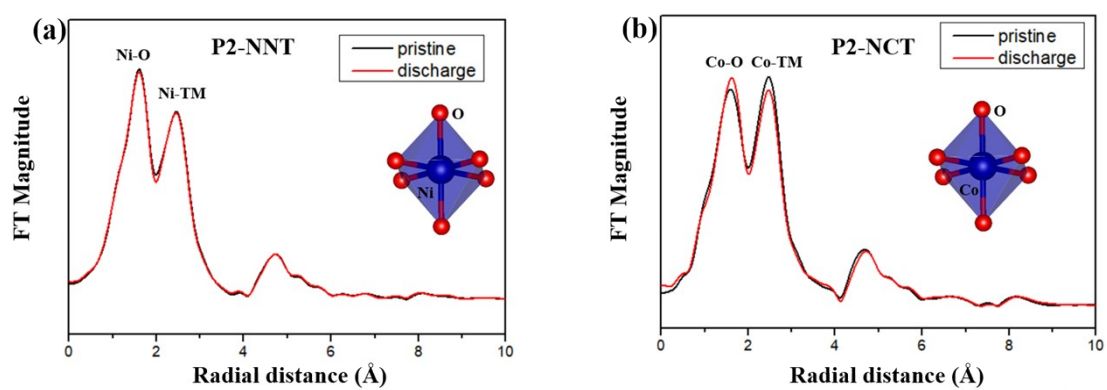

**Fig. S8.** Fourier transform data of (a) Ni K-edge XANES spectra of P2-NNT electrode and (b) Co K-edge XANES spectra of P2-NCT electrode at the pristine (blue line) and discharged states (red line).

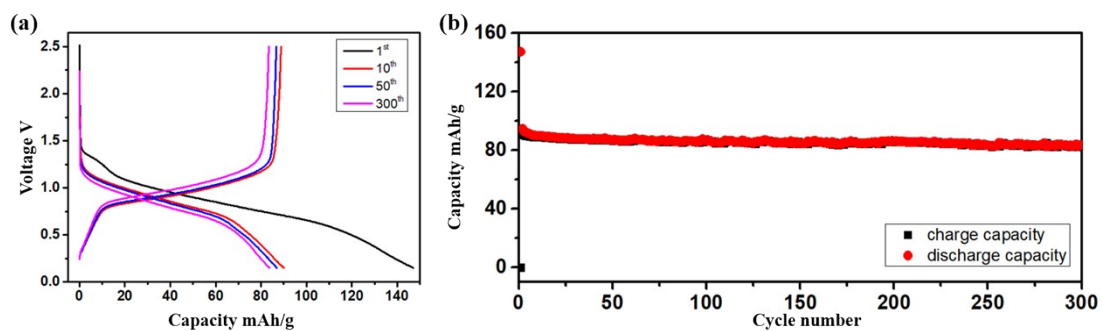

**Fig. S9.** (a) Charge/discharge profiles of of P2-NNT in the 1<sup>st</sup>, 10<sup>th</sup>, 50<sup>th</sup> and 300<sup>th</sup> cycles and (b) the long-cycle performance at 0.2 C.

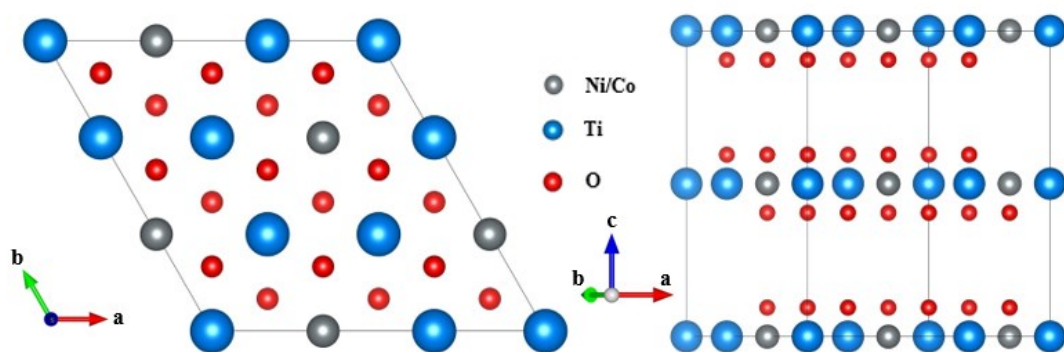

**Fig. S10.** The first possible TM arrangement in P2-type structure. The same TM ions are over against each other in this model.

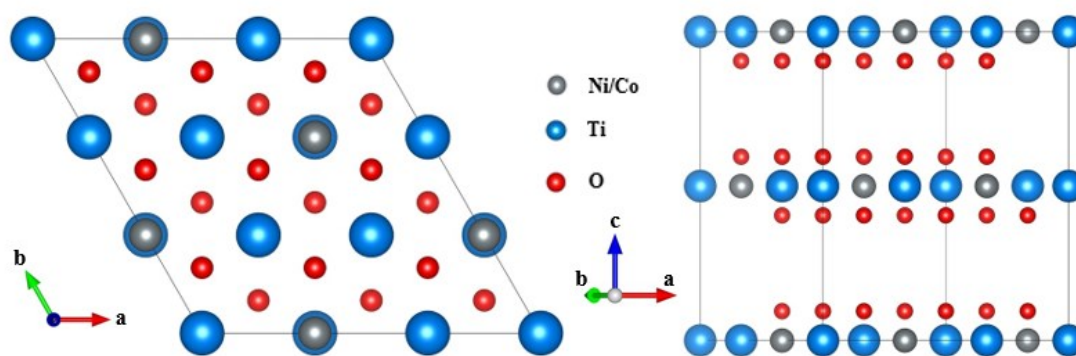

**Fig. S11.** The second possible TM arrangement in P2-type structure. Ni/Co and Ti ions are alternately located in different layers with each other.

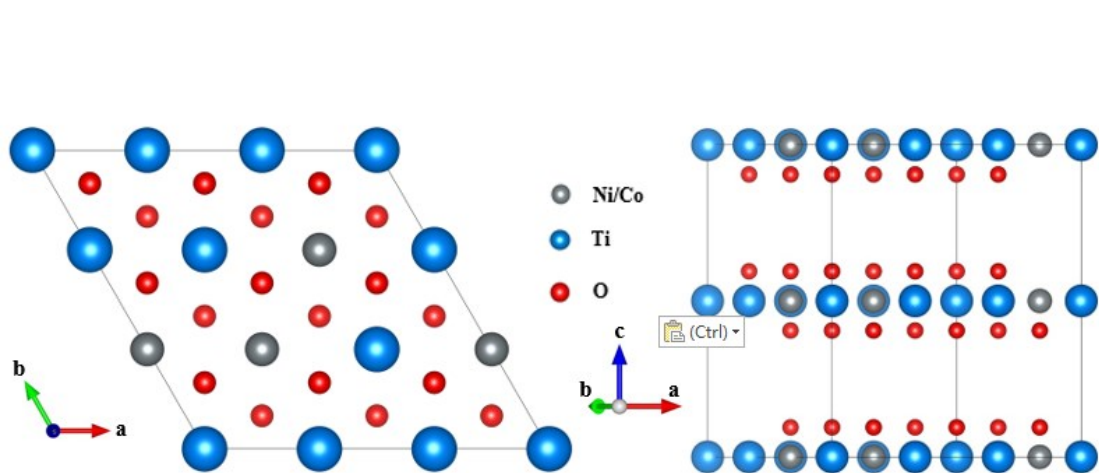

**Fig. S12.** The third possible TM arrangement in P2-type structure. Ni/Co ions and Ti ions are alternately located with each other in this model.

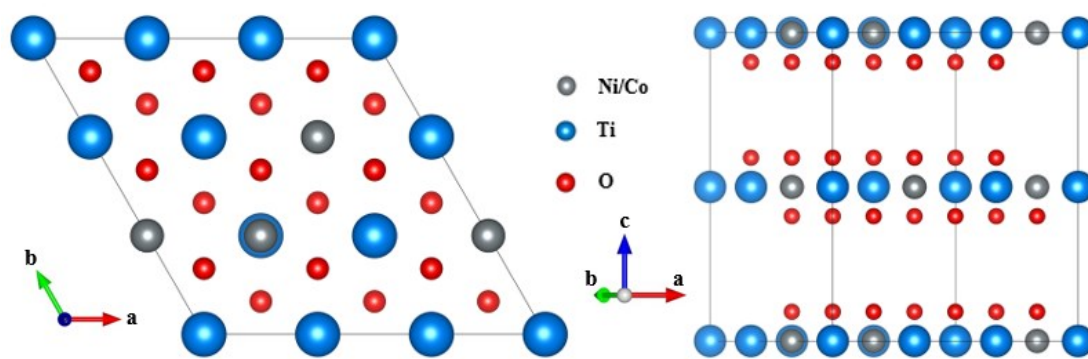

**Fig. S13.** The fourth possible TM arrangement in P2-type structure. Ni/Co and Ti ions are alternately located with each other in the same layers, and the same TM ions are over against each other in this model.

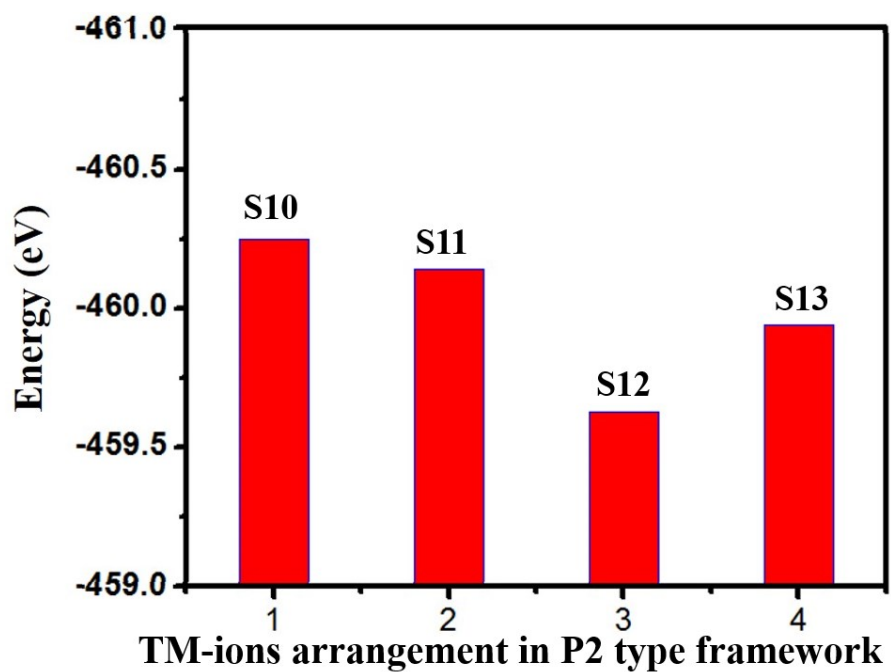

**Fig. S14.** The total energies of the four models in Fig. S10-S13. The structure model in Fig. S10 has the lowest formation energy, indicating its highest stability among all structures.

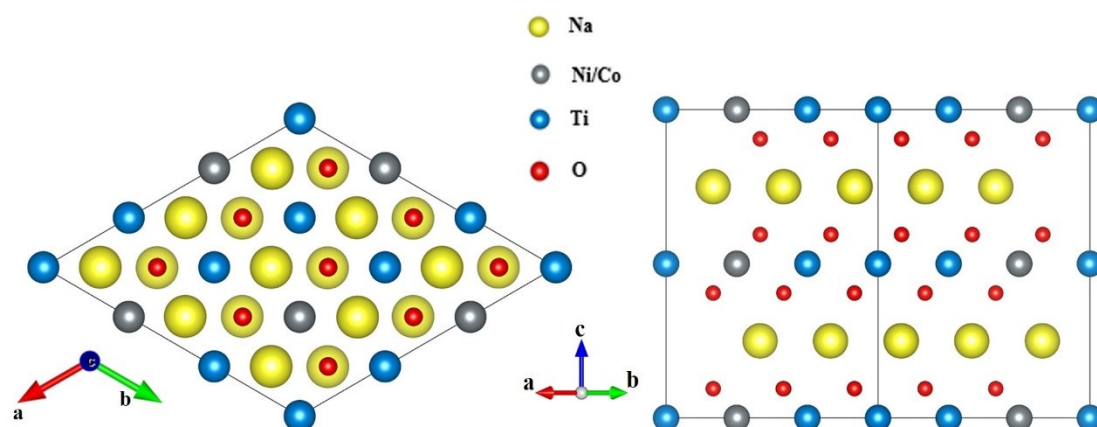

**Fig. S15.** The first possible  $\text{Na}^+$  arrangement in P2-type structure. All the  $\text{Na}^+$  ions are located in  $\text{Na}_e$  sites in this model.



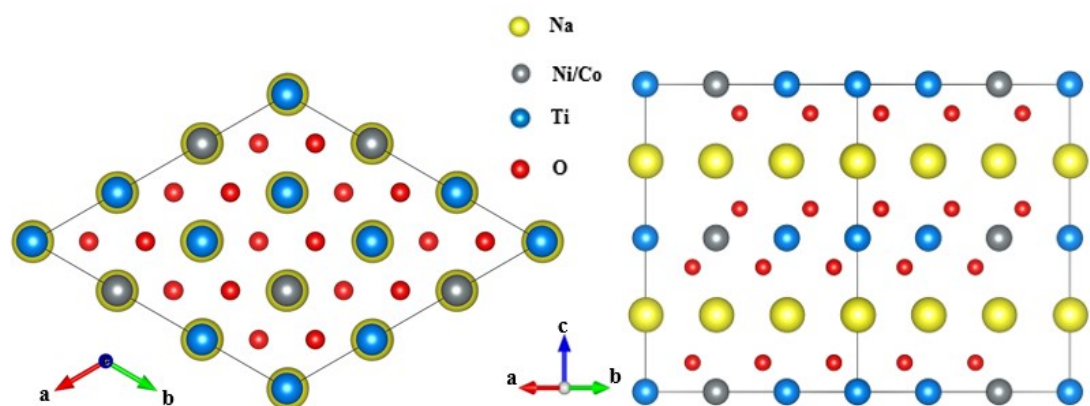

**Fig. S16.** The second possible  $\text{Na}^+$  arrangement in P2-type structure. All the  $\text{Na}^+$  are located in  $\text{Na}_f$  sites in this model.

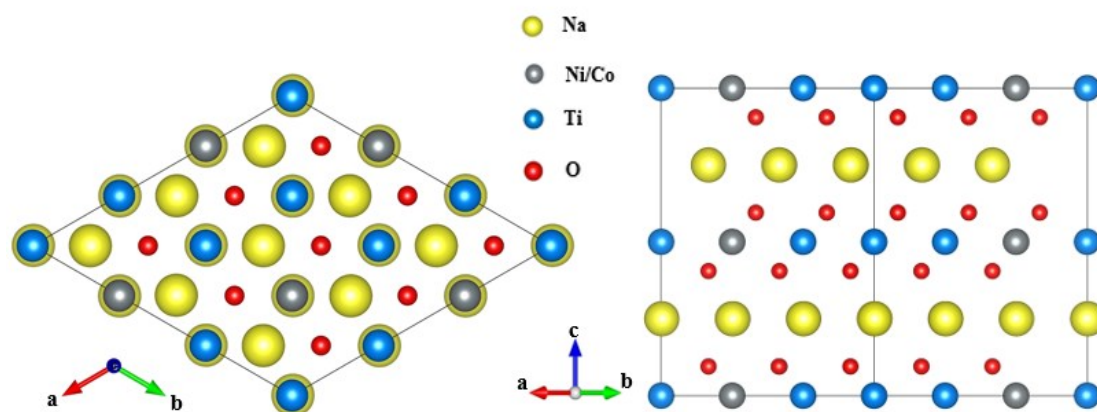

**Fig. S17.** The third possible  $\text{Na}^+$  arrangement in P2-type structure.  $\text{Na}^+$  ions are located in  $\text{Na}_e$  and  $\text{Na}_f$  sites with a ratio of 2:1 in this model.

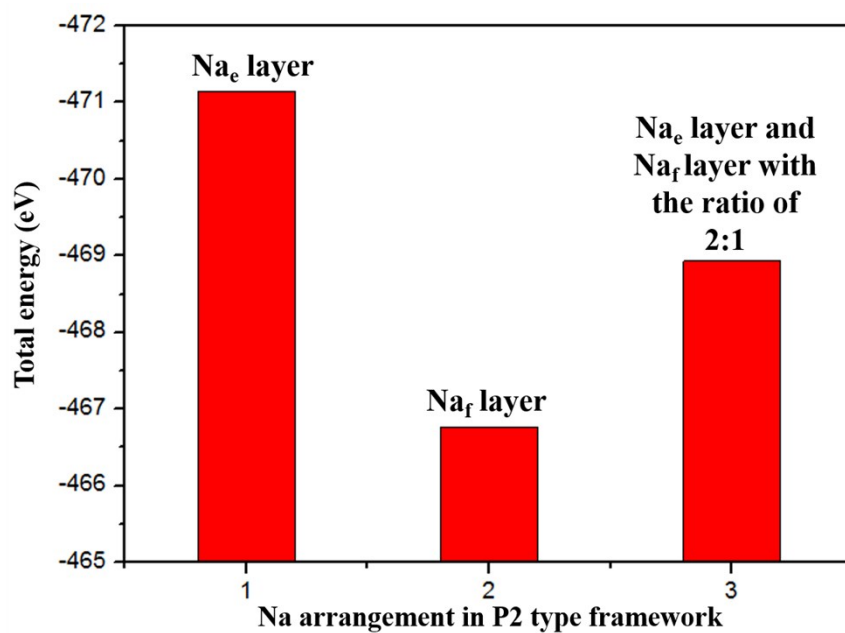

**Fig. S18.** The total energies of the three models in Fig. S15-S17. The structure model with only Na<sub>e</sub> layers has the lowest formation energy, indicating its highest stability among all models.

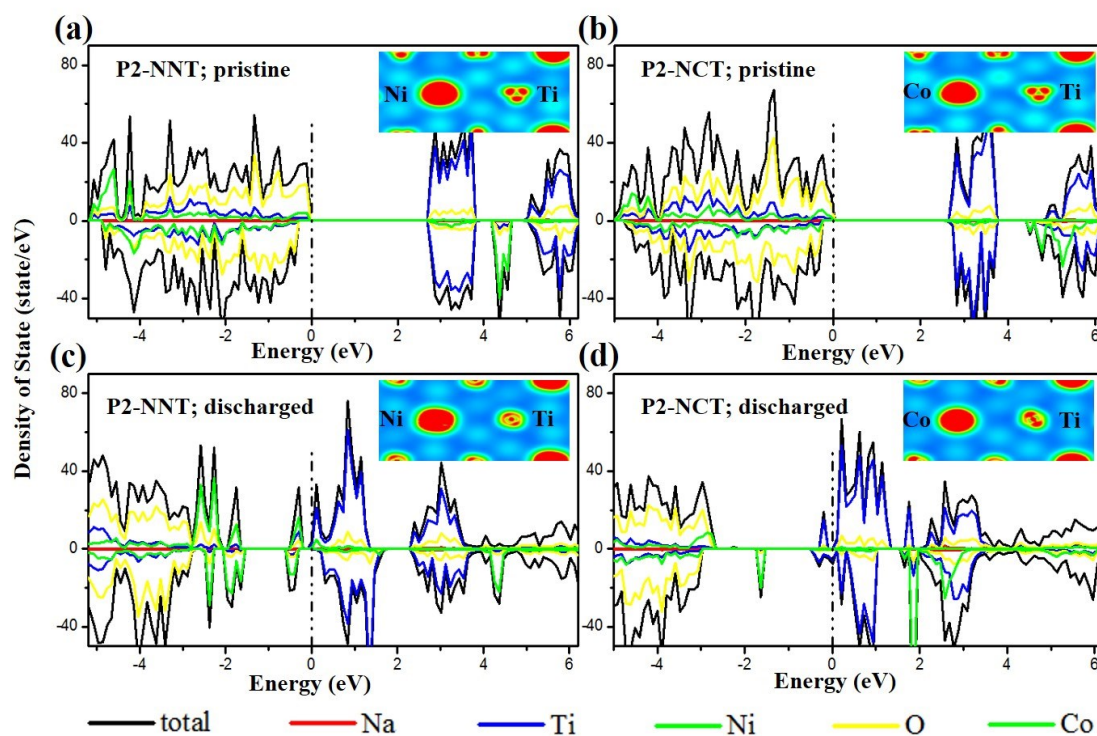

**Fig. S19.** The projected density of state (DOS) of (a) pristine state of P2-NNT, (b) pristine state of P2-NCT, (c) fully discharged state of P2-NNT, and (d) fully discharged state of P2-NCT. Insets in a-d are the corresponding charge density distribution images. The DOS values of total, Na, Ti, Ni/Co, and O are shown in black, red, blue, green and yellow lines, respectively.

**Table S1.** Rietveld refinement results of P2-NNT with lattice parameters  $a$  and  $c$ .

| Rwp: 5.161; Rexp: 2.57; GOF: 2.01 |         |            |           | space group: P63/mmc (194) |      |
|-----------------------------------|---------|------------|-----------|----------------------------|------|
| Lattice Parameter                 |         | a          |           | c                          |      |
|                                   |         | 2.96482(7) |           | 11.1669(6)                 |      |
| atom                              | x       | y          | z         | Occ.                       | Beq. |
| Na-1                              | 0.33333 | 0.66667    | 0.25000   | 0.455(4)                   | 2.88 |
| Na-2                              | 0.00000 | 0.00000    | 0.25000   | 0.214(6)                   | 4.2  |
| Ti                                | 0.00000 | 0.00000    | 0.00000   | 0.666(4)                   | 0.6  |
| Ni                                | 0.00000 | 0.00000    | 0.00000   | 0.334(2)                   | 0.6  |
| O                                 | 0.66667 | 0.33333    | 0.0941(2) | 0.945(4)                   | 0.9  |

**Table S2.** Rietveld refinement results of P2-NCT with lattice parameters  $a$  and  $c$ .

|                                   |            |         |           |                            |      |
|-----------------------------------|------------|---------|-----------|----------------------------|------|
| Rwp: 4.574; Rexp: 3.23; GOF: 1.41 |            |         |           | space group: P63/mmc (194) |      |
| Lattice Parameter                 | a          |         |           | c                          |      |
|                                   | 2.97262(6) |         |           | 11.1929(7)                 |      |
| atom                              | x          | y       | z         | Occ.                       | Beq. |
| Na-1                              | 0.33333    | 0.66667 | 0.25000   | 0.461(8)                   | 2.88 |
| Na-2                              | 0.00000    | 0.00000 | 0.25000   | 0.218(6)                   | 4.2  |
| Ti                                | 0.00000    | 0.00000 | 0.00000   | 0.662(3)                   | 0.6  |
| Co                                | 0.00000    | 0.00000 | 0.00000   | 0.338(5)                   | 0.6  |
| O                                 | 0.66667    | 0.33333 | 0.0923(8) | 0.979(8)                   | 0.9  |
